# Supplementary material
Source: ML conference proceedings conference paper supplement (https://proceedings.neurips.cc/paper_files/paper/2019/hash/2bd2e3373dce441c6c3bfadd1daa953e-Abstract.html)
Supplement: Supplementary file [file 2bd2e3373dce441c6c3bfadd1daa953e-Supplemental.zip]

## Appendix

### A Proofs in Section 3.3

*Proof of Proposition 2.* Let  $\odot$  denote element-wise multiplication with broadcasting<sup>6</sup>, and  $m < n$ . Then the contraction of  $\mathbf{U}_1, \dots, \mathbf{U}_M$  along with  $\mathcal{V}$  is written as  $\mathcal{F}_{\mathcal{V}}(\mathbf{U}_1, \dots) = \mathcal{F}_{\mathcal{V} \setminus v_m}(\mathbf{U}_1, \dots, \mathbf{U}_{m-1}, \mathbf{U}_{m+1}, \dots, \mathbf{U}_{n-1}, \mathbf{U}_m \odot \mathbf{U}_n, \dots)$ . Since  $\mathbf{U}_m \odot \mathbf{U}_n \in \mathbb{R}^{\times_{a \in v_n} \theta(a)}$  for any  $\mathbf{U}_m$  and  $\mathbf{U}_n$ ,  $\mathcal{F}_{\mathcal{V}}(\dots)$  reduces to  $\mathcal{F}_{\mathcal{V} \setminus v_m}(\dots)$ .  $\square$

*Proof of Proposition 3.* Let  $\text{Col}(\mathbf{U}_m, a, b)$  denote the collapsing operator that reshapes tensor  $\mathbf{U}_m$  by concatenating its indices  $\{a, b\}$  if  $\{a, b\} \subseteq v_m$ , and creates a new index  $b'$  where its inner dimension is  $R_{b'} = R_a R_b$ . Since  $\mathcal{F}_{\mathcal{V}}(\mathbf{U}_1, \mathbf{U}_2, \dots) = \mathcal{F}_{\mathcal{V} \odot a}(\text{Col}(\mathbf{U}_1, a, b), \text{Col}(\mathbf{U}_2, a, b), \dots)$ , Proposition 3 can be proved using the same technique as in the proof of Proposition 2.  $\square$

*Proof of Proposition 4.* Suppose we have  $M$  size-invariant convolutions of size  $(I_1, J_1), \dots, (I_M, J_M)$ . By simple calculation, we see that the final convolution size  $(I, J)$  is determined by  $I = 1 + \sum_{m \in [M]} (I_m - 1)$  and  $J = 1 + \sum_{m \in [M]} (J_m - 1)$ . Therefore, possible choices are to change  $\{I_m, J_m \mid m \in [M]\}$  with varying  $M \geq \min(\frac{I-1}{2}, \frac{J-1}{2})$ . The problem is thus reduced to the partition of integers, as stated.  $\square$

*Proof of Theorem 1.* For simplicity, consider 2D convolution with a  $3 \times 3$  filter ( $I = J = 3$ ). Suppose we have  $L \in \mathbb{N}$  inner indices  $\mathcal{A} = \{c, r_1, \dots, r_{L-1}\}$ . According to Proposition 4, the vertical index  $i$  and the horizontal index  $j$  have to be used only once, and in only two possible patterns: either (i) they are used on the same vertex, or (ii) they are separated on different vertices. First, we consider case (i). Assume  $v_1$  contains  $\{i, j\}$  and the subset of  $\mathcal{A}$ , which contains  $2^L$  patterns, and let  $\mathcal{A}_1 = v_1 \setminus \{i, j\} \subseteq 2^{\mathcal{A}}$  be the selected subset. Next, consider  $v_2$ . To avoid the redundancy described in Proposition 2,  $v_2$  must contain indices that are not contained in  $v_1$ , which means that the choices for  $v_2$  are in  $2^{\mathcal{A} \setminus 2^{\mathcal{A}_1}}$ . Repeating this process for  $v_3, v_4, \dots$ , we see that the number of patterns monotonically decreases. Moreover, the maximum length of the vertices is  $L + 1$ , which is achieved when  $\mathcal{A}_1 = \{\emptyset\}$  and each of  $v_2, \dots, v_{L+1}$  has a single inner index. Therefore the number of nonredundant hypergraphs is finite. Case (ii) may be analyzed in the same way, except the maximum length of the vertices is  $L + 2$ . For the case of larger filter sizes, we can employ a similar method using Proposition 4 that ensures that the number of combination patterns of the factoring convolution will be finite.  $\square$

## B Training Recipes

### B.1 Enumeration

**2D** The architecture is Einconv(64)–MaxPooling–Einconv(128)–MaxPooling–FC(10)–Softmax, where Einconv( $k$ ) denotes an Einconv layer with  $k$  output channels and FC( $k$ ) denotes a fully-connected layer with  $k$  output units. Maxpooling is performed by a factor of 2 for each spatial dimension. We trained for 50 epochs using the Adam optimizer with a batch size 16, learning rate  $2\text{E-}4$ , and weight decay rate  $1\text{E-}6$ .

**3D** The architecture is Einconv(64)–ReLU–Einconv(128)–ReLU–MaxPooling–Einconv(256)–ReLU–Einconv(256)–ReLU–MaxPooling–Einconv(512)–ReLU–Einconv(512)–ReLU–GAP–FC(512)–FC(512)–FC(10)–Softmax, where GAP denotes global average pooling. We applied dropout with rate 50% to fully-connected layers except the last layer. Other settings were the same as the 2D case.

### B.2 GA Search

**LeNet-5** The architecture is Einconv(32)–MaxPooling–Einconv(32)–MaxPooling–FC(10)–Softmax. We trained for at most 250 epochs using the Adam optimizer with batch size 128, learning rate  $2\text{E-}4$ , and weight decay rate  $5\text{E-}4$ .

<sup>6</sup><https://docs.scipy.org/doc/numpy-1.13.0/user/basics.broadcasting.html>

**ResNet-50** We replaced all the bottleneck layers in ResNet-50 that do not rescale the spatial size by Einconv layers. We trained for at most 300 epochs using momentum SGD with batch size 32, a learning rate 0.05 that was halved every 25 epochs, and a weight decay rate  $5E-4$ . Also, we used standard data augmentation methods: random rotation, color lightning, color flip, random expansion, and random cropping.
